# Supplementary figures and images for: Prevention of microalbuminuria using early intervention with renin-angiotensin system inhibitors in patients with type 2 diabetes: A systematic review
Source: PubMed Central journal article supplement — J Renin Angiotensin Aldosterone Syst. 2016 Aug 3;17(3):1470320316652047. doi: 10.1177/1470320316652047 (PMC5843870; doi:10.1177/1470320316652047), 2016-08-03

Supplemental Figure 1.

Trial sequential analysis of the six included trials.

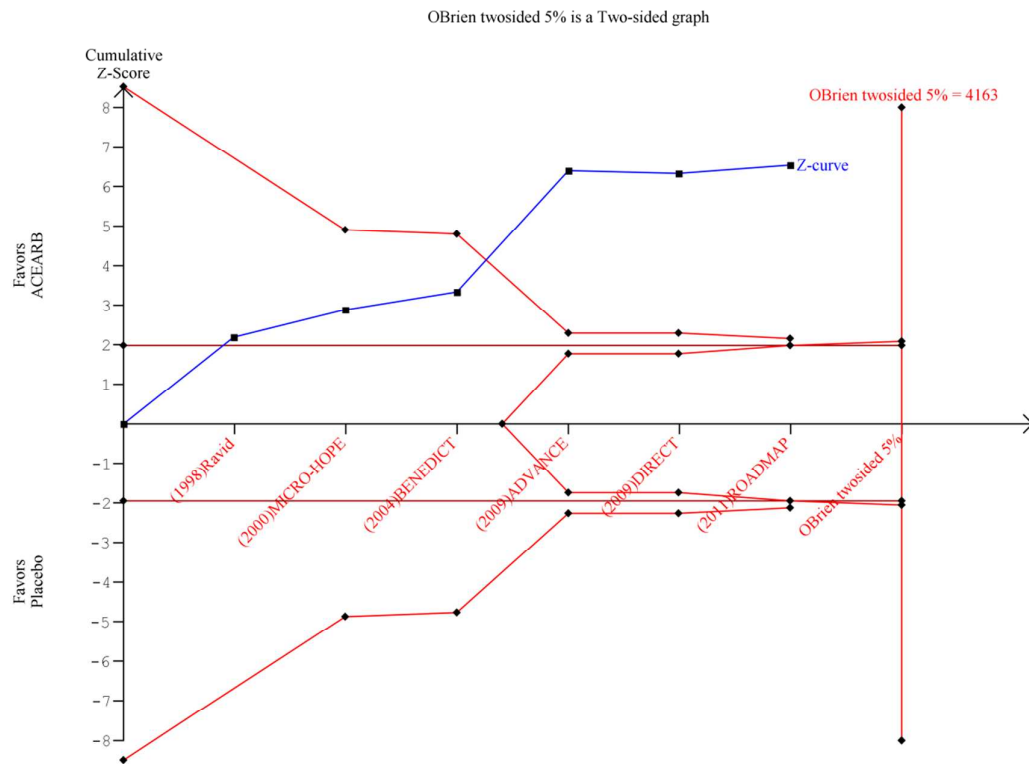

Supplement: jraas-2016-0026.pdf [file jraas-2016-0026.pdf]
